# Supplementary material
Source: HighWire-hosted journal article supplement (https://sti.bmj.com/content/95/7/516)

**Supplementary Figure S1. Scatter plots showing the correlation between (A) the number of kissing-only partners and sex-only partners; (B) the kissing-only partners and number of kissing-with-sex partners; and (C) the kissing-with-sex partners and sex-only partners.**

(A)

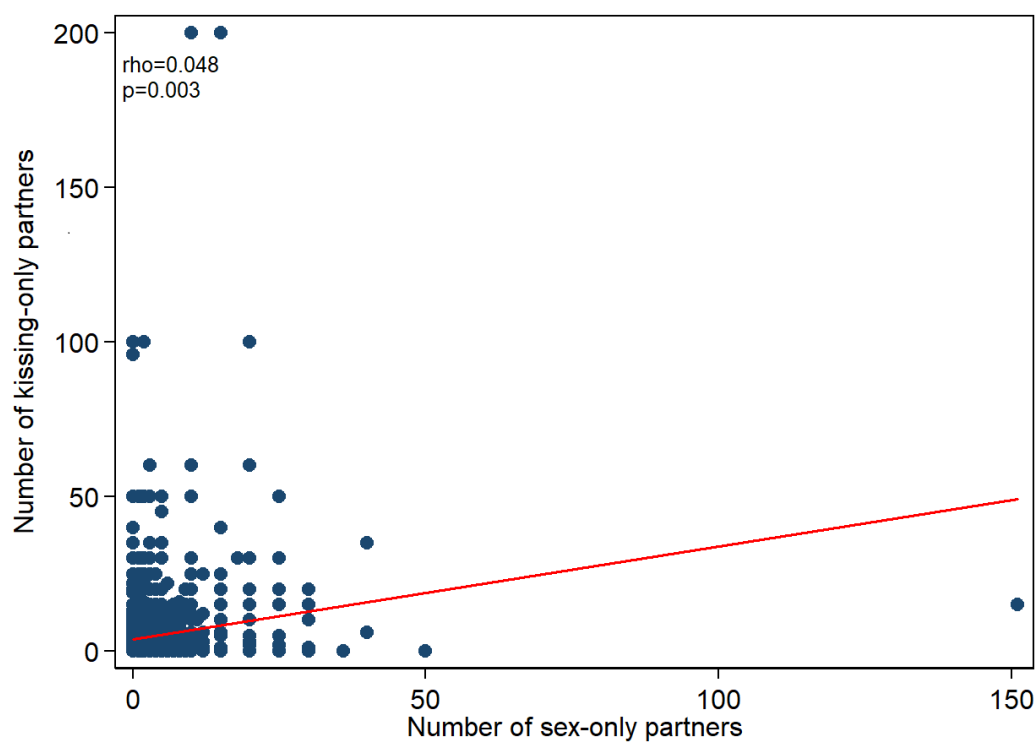

(B)

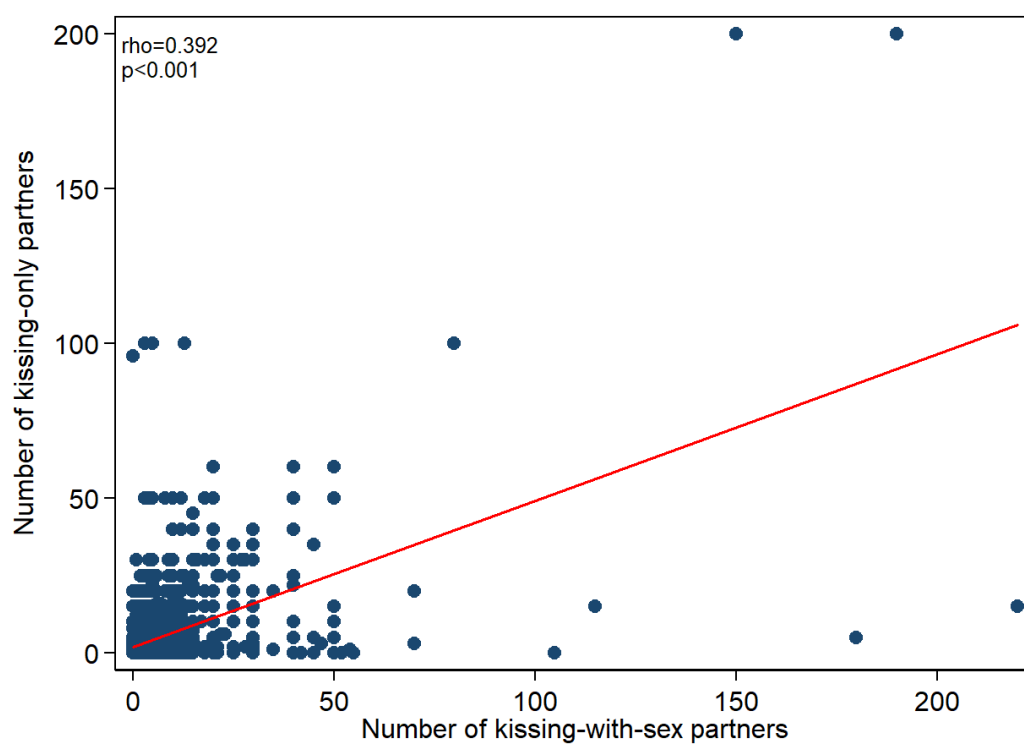

(C)

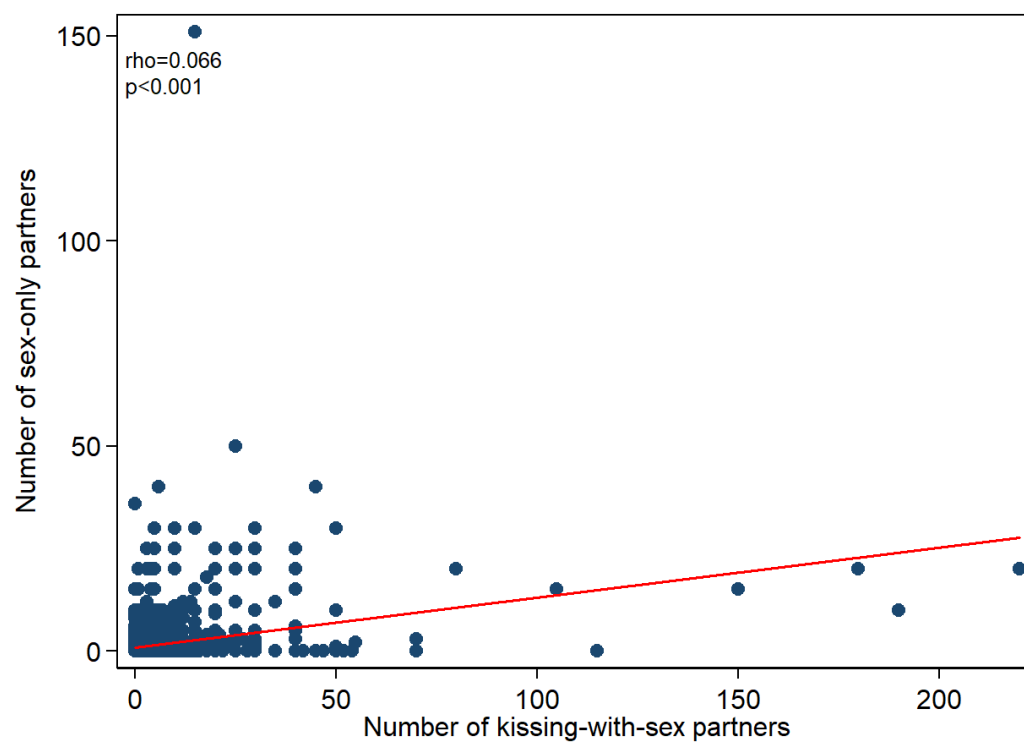

Supplement: inline-supplementary-material-1 [file inline-supplementary-material-1.pdf]
